# Supplementary material
Source: HighWire-hosted journal article supplement (https://jitc.bmj.com/content/11/5/e005980)
Supplement: inline-supplementary-material-7 [file inline-supplementary-material-7.pdf]

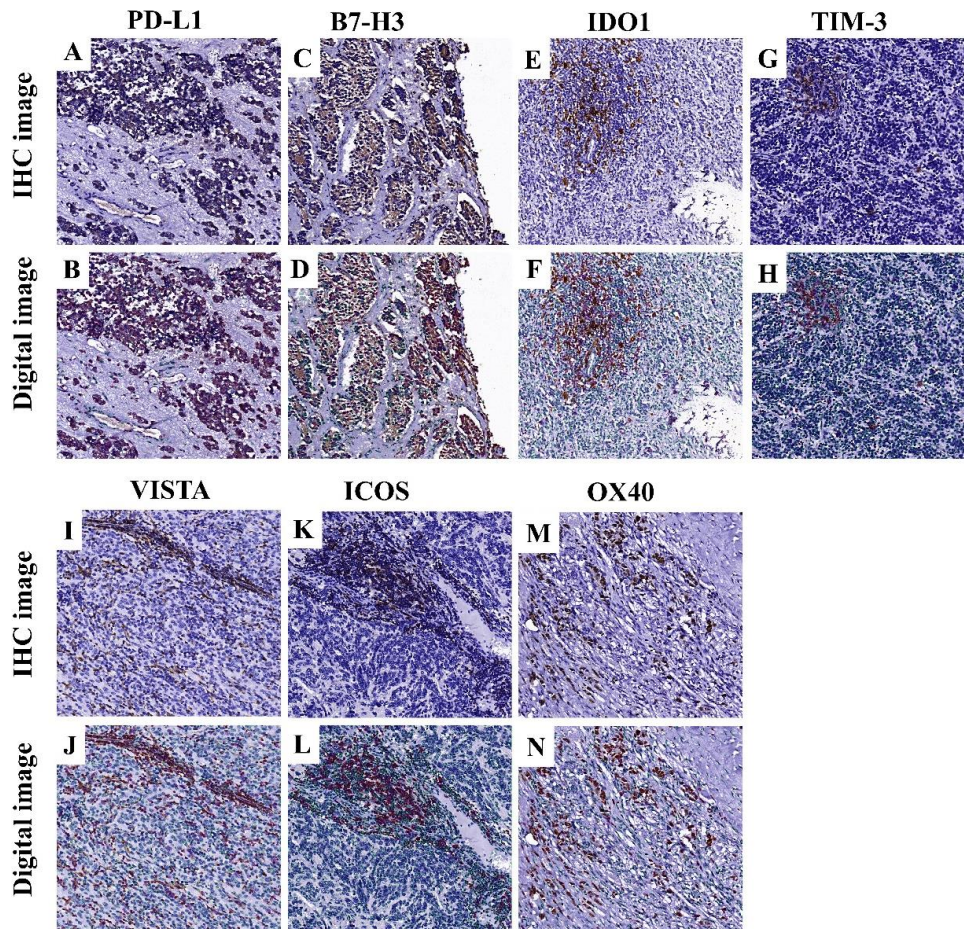

**Supplementary Figure S4.** Representative immunohistochemistry images of PD-L1, B7-H3, IDO1, TIM-3, VISTA, ICOS and OX40 expression (A, C, E, G, I, K, and M) and corresponding visual nucleus segmentation images in red colour as positive and green colour as negative using digital pathology (B, D, F, H, J, L, and N).

**Abbreviations:** PD-L1, programmed death ligand 1; IDO1, indoleamine-pyrrole 2,3-dioxygenase 1; TIM-3, T cell immunoglobulin and mucin domain containing-3; ICOS, inducible costimulatory molecule; OX40, costimulatory molecule 40.
