# Supplementary material
Source: HighWire-hosted journal article supplement (https://jitc.bmj.com/content/11/5/e005980)
Supplement: inline-supplementary-material-11 [file inline-supplementary-material-11.pdf]

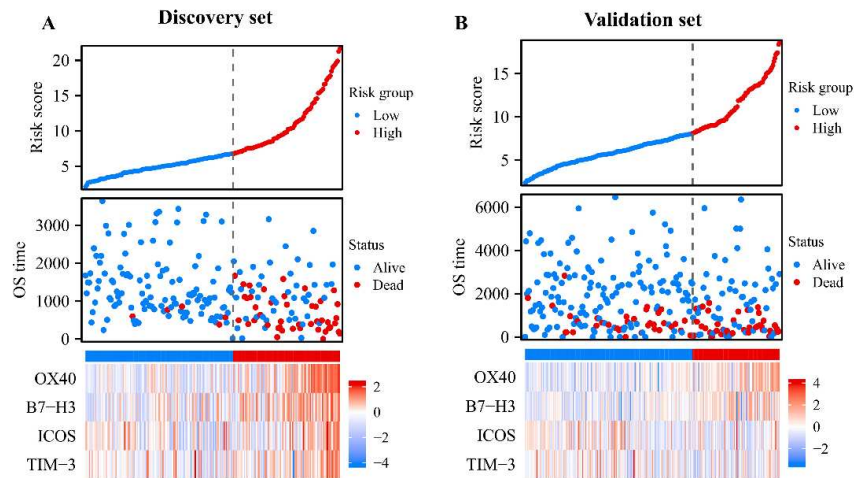

**Supplementary Figure S8.** The relationship between different risk scores and patients' follow-up time, events, and gene expression levels and an increase in the risk scores (from left to right on the X axis, see the top figure), the survival rate of patients obviously decreased (see the middle figure) and was accompanied by a higher expression of these immune checkpoints (see the bottom figure) in the discovery set (A) and validation set (B).

**Abbreviations:** OS, overall survival; TIM-3, T cell immunoglobulin and mucin domain containing-3; ICOS, inducible costimulatory molecule; OX40, costimulatory molecule 40.
