# Supplementary material
Source: HighWire-hosted journal article supplement (https://jitc.bmj.com/content/11/5/e005980)
Supplement: inline-supplementary-material-14 [file inline-supplementary-material-14.pdf]

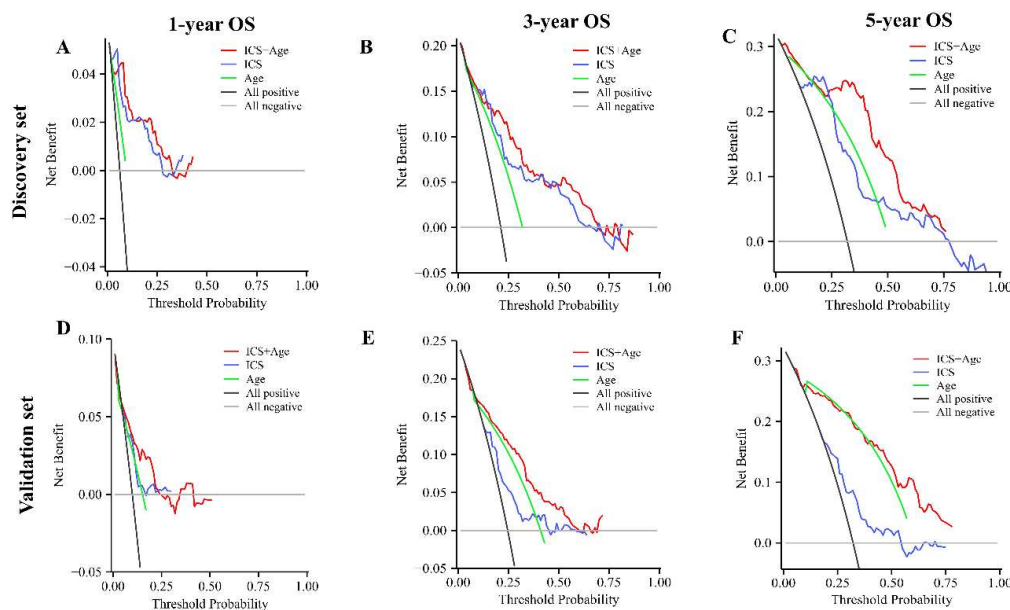

**Supplementary Figure S10.** DCA curves showing the performance (net benefit) of each model in predicting 1-year, 3-year and 5-year OS in the discovery (top panel) and validation sets (bottom panel). The y-axis represents the net benefit, which is the probability of true positives minus the probability of false positives weighted for the threshold probability. The black line shows the net benefit of considering all patients positive; the solid grey horizontal line considers all patients negative. In the discovery set, the net benefit in the ICS + age model would show advantages over the ICS and age only in predicting 1-year (A), 3-year (B) and 5-year (C) OS, which were confirmed in the validation set (D, E and F, respectively). The net benefit is calculated as (proportion of true positives) – (proportion of false-positives) \* the threshold probability/(1– the threshold probability).

**Abbreviations:** DCA, decision curve analysis; ICS, immune checkpoint-based signature; OS, overall survival.
